# Supplementary material for: A three-dimensional conducting oxide hollow nanobead photoanode: synthesis, characterization, and applications in dye-sensitized solar cells
Source: Royal Society of Chemistry journal article supplement (doi:10.1039/c4ta06324d), 2014-12-19
Supplement: c4ta06324d1.pdf [file c4ta06324d1.pdf]

## Supporting Information

### **Three-dimensional conducting oxide hollow nanobead photoanodes: synthesis, characterization, and applications in dye-sensitized solar cells**

*Fa-Qian Liu, Juan Su, Wei Wang, Wei-Hua Li, Hai-Qing Hu, Lei Wang, and Rong-Xun Li*

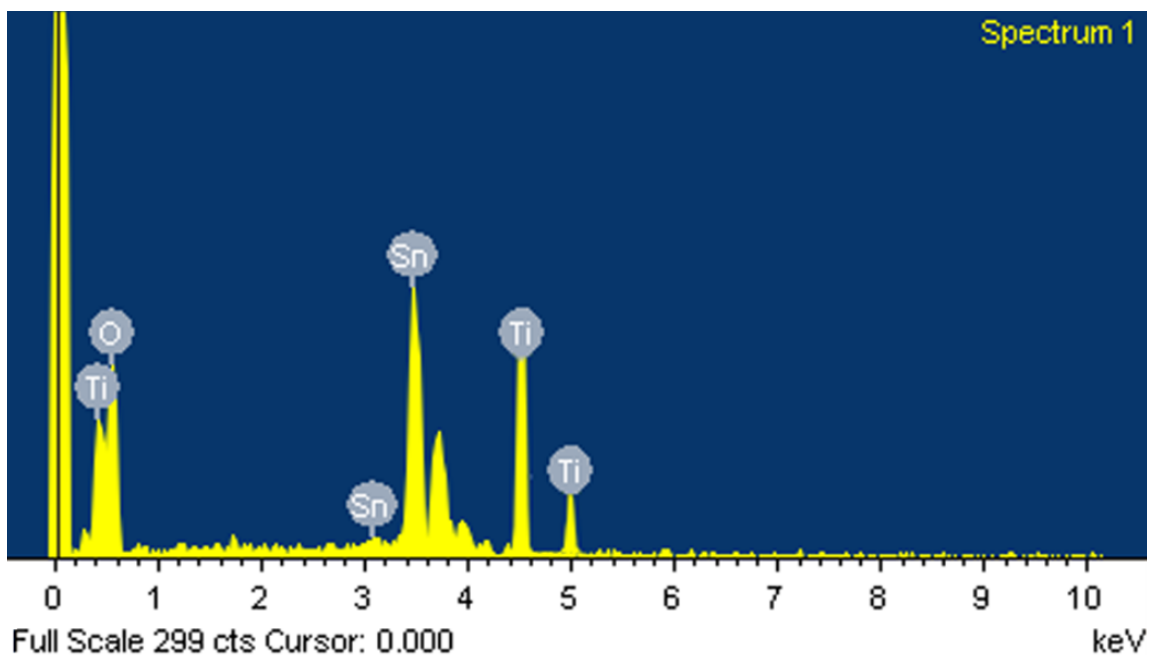

**Fig. S1** EDX spectrum of the 3-D FTO photoanode after the coating of  $\text{TiO}_2$ .

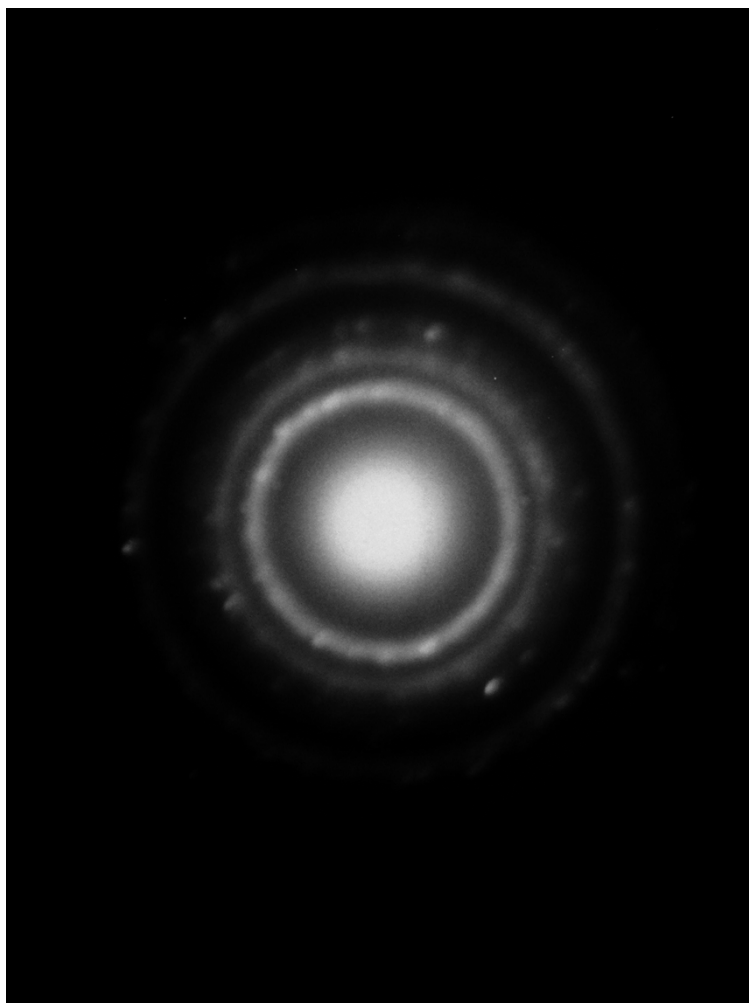

**Fig. S2** Electron diffraction ring patterns of the 3-D FTO photoanode after the coating of  $\text{TiO}_2$ .

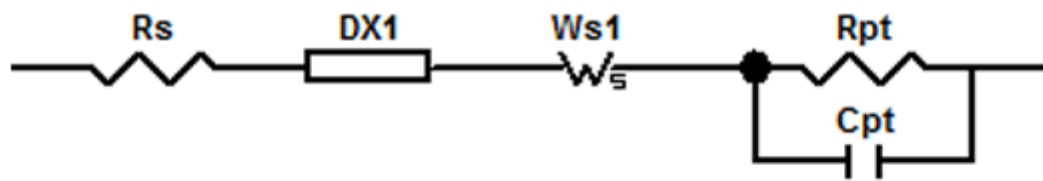

$DX1 =$

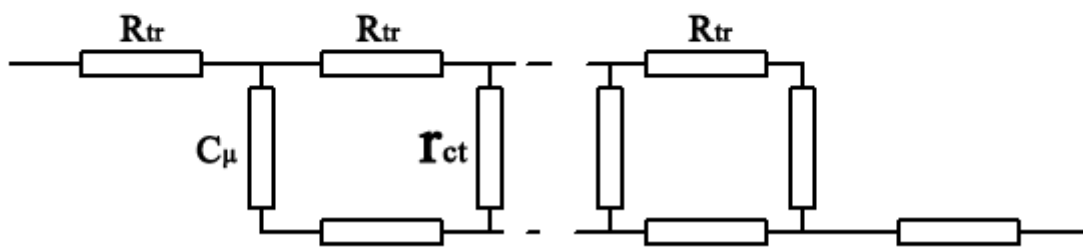

**Fig. S3** the equivalent circuit and transmission line model used for the fitting.

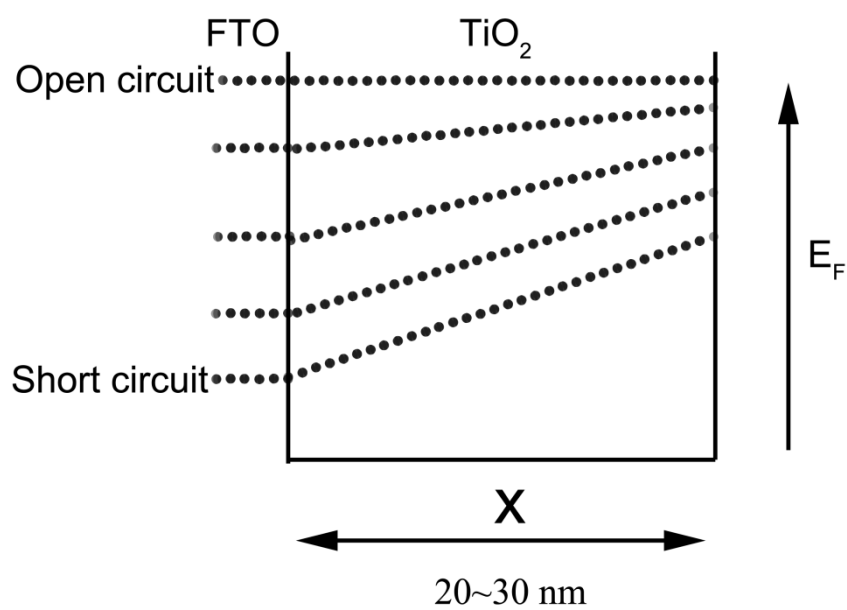

**Fig. S4** Fermi level ( $E_F$ ) at TiO<sub>2</sub>/FTO interface.
